# Supplementary material for: Acute Pancreatitis Increases the Risk of Gastrointestinal Cancer in Type 2 Diabetic Patients: A Korean Nationwide Cohort Study
Source: MDPI journal article supplement (doi:10.3390/cancers14225696), 2022-11-20
Supplement: s1 [file s1]

## Acute Pancreatitis Increases the Risk of Gastrointestinal Cancer in Type 2 Diabetic Patients: A Korean Nationwide Cohort Study

Jin Ho Choi, Woo Hyun Paik, Dong Kee Jang, Min Kyu Kim, Ji Kon Ryu, Yong-Tae Kim, Kyungdo Han and Sang Hyub Lee

**Table S1. ICD-10-CM code for each type of cancer used in this study.**

| Cancer Type              |                         | ICD-10-CM Code |
|--------------------------|-------------------------|----------------|
| Overall                  |                         | C              |
| Gastrointestinal cancers | Esophagus               | C15            |
|                          | Stomach                 | C16            |
|                          | Colon and rectum        | C18–20         |
|                          | Liver                   | C220           |
|                          | Pancreas                | C25            |
|                          | Biliary cancer          | C221, C24      |
|                          | Gallbladder             | C23            |
| Other cancers            | Prostate                | C61            |
|                          | Lung                    | C33, C34       |
|                          | Thyroid                 | C73            |
|                          | Bladder                 | C67            |
|                          | Corpus                  | C54            |
|                          | Larynx                  | C32            |
|                          | Multiple myeloma        | C88–90         |
|                          | Kidney                  | C64            |
|                          | Lymphoma                | C82–C85        |
|                          | Leukemia                | C91–C95        |
|                          | Breast                  | C50            |
|                          | Ovary                   | C56            |
|                          | Testicle                | C62            |
|                          | Oral cavity and pharynx | C00–C06        |
|                          | Cervix                  | C53            |
|                          | Nerves                  | C71, C72       |
|                          | Skin                    | C43, C44       |

**Table S2. Subgroup analysis and evaluation for interaction according to two level of alcohol consumption.**

| Alcohol level     | consumption | HR for Gastrointestinal Cancer Development in AP Group vs NAP Group |                        |                        |                        |                       |                        |                        |
|-------------------|-------------|---------------------------------------------------------------------|------------------------|------------------------|------------------------|-----------------------|------------------------|------------------------|
|                   |             | Esophagus                                                           | Stomach                | Colon and rectum       | Liver                  | Pancreas              | Gallbladder            | Bile duct              |
|                   |             | Crude HR<br>(95% CI)                                                | Crude HR<br>(95% CI)   | Crude HR<br>(95% CI)   | Crude HR<br>(95% CI)   | Crude HR<br>(95% CI)  | Crude HR<br>(95% CI)   | Crude HR<br>(95% CI)   |
| None or moderate  |             | 1.046<br>(0.25–4.376)                                               | 1.688<br>(1.019–2.728) | 2.226<br>(1.603–3.089) | 2.209<br>(1.571–3.106) | 5.58<br>(4.577–7.554) | 0.998<br>(0.136–7.316) | 3.254<br>(1.558–6.796) |
| Heavy             |             | 1.849<br>(0.896–3.814)                                              | 1.627<br>(1.285–2.061) | 2.167<br>(1.857–2.53)  | 2.202<br>(1.816–2.671) | 4.315<br>(3.808–4.89) | 2.733<br>(1.601–4.665) | 4.181<br>(3.104–5.633) |
| P for interaction |             | 0.4175                                                              | 0.9189                 | 0.7197                 | 0.7785                 | 0.0107                | 0.3355                 | 0.4024                 |

HR, hazard ratio; AP, acute pancreatitis; NAP, non-acute pancreatitis; CI, confidence interval.
